# Supplementary material
Source: PubMed Central journal article supplement (PMC3700698)
Supplement: CJN.10461012_CJN10461012SupplementaryData.pdf [file CJN.10461012_CJN10461012SupplementaryData.pdf]

SUPPLEMENTAL MATERIAL

APPENDIX A

Baseline characteristics of study population, by First Nations and CKD status

|                                                                       | Non-First Nations<br>(N = 140,709) |                     | First Nations<br>(N = 6,574) |                  |
|-----------------------------------------------------------------------|------------------------------------|---------------------|------------------------------|------------------|
|                                                                       | No CKD<br>(N = 106,946)            | CKD<br>(N = 33,763) | No CKD<br>(N = 5,710)        | CKD<br>(N = 864) |
| <b>Age in yrs, mean (SD)</b>                                          | 58.3 (14.4)                        | 72.4 (11.5)         | 51.5 (13.3)                  | 64.2 (12.0)      |
| <b>Female, N (%)</b>                                                  | 47,372 (44.3)                      | 18,898 (56.0)       | 3,219 (56.4)                 | 563 (65.2)       |
| <b>eGFR ml/min/1.73 m<sup>2</sup>, mean (SD) *</b>                    | 83.7 (17.2)                        | 46.4 (11.1)         | 94.5 (22.7)                  | 44.3 (13.5)      |
| <b>Hypertension, N (%)</b>                                            | 60,192 (56.3)                      | 28,795 (85.3)       | 2,713 (47.5)                 | 686 (79.4)       |
| <b>Charlson co-morbidity index, median (IQR)</b>                      | 1 (1 - 2)                          | 2 (1 - 3)           | 1 (1 - 2)                    | 2 (1 - 4)        |
| <b>Location of residence, N (%)</b>                                   |                                    |                     |                              |                  |
| Urban                                                                 | 89,287 (83.5)                      | 27,197 (80.6)       | 2,513 (44.0)                 | 356 (41.2)       |
| Rural                                                                 | 17,129 (16.0)                      | 6,330 (18.8)        | 3,184 (55.8)                 | 508 (58.8)       |
| Unknown                                                               | 530 (0.5)                          | 236 (0.7)           | 13 (0.2)                     | 0 (0)            |
| <b>Income quintiles, N (%)</b>                                        |                                    |                     |                              |                  |
| 1 (lowest)                                                            | 22,500 (21.0)                      | 7,408 (21.9)        | 3,000 (52.5)                 | 415 (48.0)       |
| 2                                                                     | 23,012 (21.5)                      | 7,507 (22.2)        | 797 (14.0)                   | 131 (15.2)       |
| 3                                                                     | 21,006 (19.6)                      | 6,504 (19.3)        | 651 (11.4)                   | 103 (11.9)       |
| 4                                                                     | 20,205 (18.9)                      | 5,892 (17.5)        | 469 (8.2)                    | 52 (6.0)         |
| 5 (highest)                                                           | 17,738 (16.6)                      | 5,279 (15.6)        | 453 (7.9)                    | 86 (10.0)        |
| Unknown                                                               | 2,485 (2.3)                        | 1,173 (3.5)         | 340 (6.0)                    | 77 (8.9)         |
| <b>Prior specialist care (nephrology or internal medicine), N (%)</b> | 26,872 (25.1)                      | 11,578 (34.3)       | 924 (16.2)                   | 241 (27.9)       |

## APPENDIX B

### Proportion of Non-First Nations and First Nations People with diabetes who had assessment of quality indicators

|                        | <b>Non-First Nations<br/>(N = 140,709)</b> | <b>First Nations<br/>(N = 6,574)</b> |
|------------------------|--------------------------------------------|--------------------------------------|
| <b>ACR, number (%)</b> | 49,384 (35.1)                              | 1,738 (26.4)                         |
| <b>LDL, number (%)</b> | 73,274 (52.1)                              | 2,491 (37.9)                         |
| <b>A1C, number (%)</b> | 89,935 (63.9)                              | 3,473 (52.8)                         |

### Proportion of Non-First Nations and First Nations People with diabetes who achieved LDL target

|                                                              | <b>Non-First Nations with LDL<br/>measured<br/>(N = 73,274)</b> | <b>First Nations with LDL<br/>measured<br/>(N = 2,491)</b> |
|--------------------------------------------------------------|-----------------------------------------------------------------|------------------------------------------------------------|
| <b>Mean LDL <math>\leq</math> 96.7 mg/dl,<br/>number (%)</b> | 39,807 (54.3)                                                   | 1,279 (51.3)                                               |

### Proportion of Non-First Nations and First Nations People with diabetes who achieved A1C target

|                                                  | <b>Non-First Nations with A1C<br/>measured<br/>(N = 89,935)</b> | <b>First Nations with A1C<br/>measured<br/>(N = 3,473)</b> |
|--------------------------------------------------|-----------------------------------------------------------------|------------------------------------------------------------|
| <b>Mean A1C <math>\leq</math> 7%, number (%)</b> | 45,725 (50.8)                                                   | 1,504 (43.3)                                               |

## APPENDIX C

### Crude number and rate of ESRD per 1000 person-years, by First Nations and CKD status

|               | Non-First Nations<br>N (%) of ESRD | Non-First Nations<br>Crude rate (95% CI)<br>per 1000 PY | First Nations<br>N (%) of ESRD | First Nations<br>Crude rate (95% CI)<br>per 1000 PY |
|---------------|------------------------------------|---------------------------------------------------------|--------------------------------|-----------------------------------------------------|
| <b>No CKD</b> | 167 (0.2)                          | 0.41 (0.35 – 0.48)                                      | 20 (0.4)                       | 0.94 (0.53 – 1.36)                                  |
| <b>CKD</b>    | 971 (2.9)                          | 8.04 (7.54 – 8.55)                                      | 104 (12.0)                     | 35.93 (29.02 – 42.83)                               |

### Crude numbers for ESRD, doubling of serum creatinine, and composite renal outcome, by First Nations and CKD status

|                                         | No CKD<br>Non-First Nations<br>(N = 106,946) | No CKD<br>First Nations<br>(N = 5,710) | CKD<br>Non-First Nations<br>(N = 33,763) | CKD<br>First Nations<br>(N = 864) |
|-----------------------------------------|----------------------------------------------|----------------------------------------|------------------------------------------|-----------------------------------|
| <b>ESRD, N (%)</b>                      | 167 (0.2)                                    | 20 (0.4)                               | 971 (2.9)                                | 104 (12.0)                        |
| <b>Doubling serum creatinine, N (%)</b> | 1,060 (1.0)                                  | 98 (1.7)                               | 1,357 (4.0)                              | 96 (11.1)                         |
| <b>Composite renal outcome, N (%)</b>   | 1,115 (1.0)                                  | 102 (1.8)                              | 1,810 (5.4)                              | 146 (16.9)                        |
